# Supplementary material for: Effects of Dietary Starch Structure on Growth Performance, Serum Glucose–Insulin Response, and Intestinal Health in Weaned Piglets
Source: PubMed Central journal article supplement (PMC7142567; doi:10.3390/ani10030543), 2020-03-24
Supplement: animals-10-00543-s001.pdf [file animals-10-00543-s001.pdf]

Additional file:

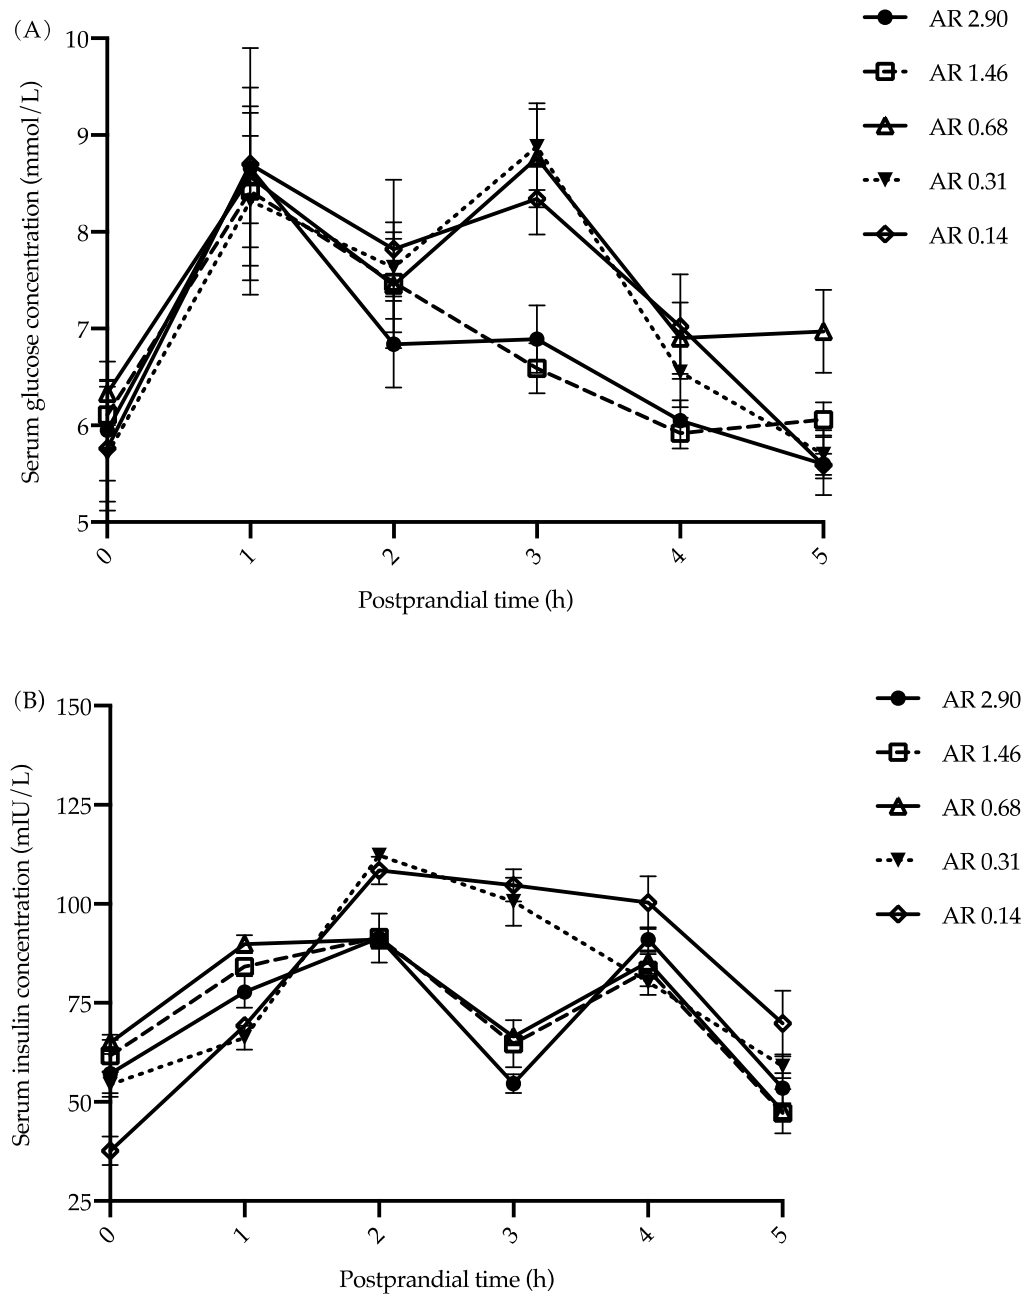

**Figure S1.** Effects of dietary starch structure on serum glucose concentration (A) and insulin concentration (B). Samples were collected during the first 5 h after feeding. Values are means (n = 6). Significant refer to Tables 5 and 6, respectively.
